# Supplementary material for: Recycling spent batteries to green innovation: a CuCo-based composite as an electrocatalyst for CO2 reduction
Source: Royal Society of Chemistry journal article supplement (doi:10.1039/d4se00368c), 2024-01-01
Supplement: d4se00368c1.pdf [file d4se00368c1.pdf]

## Supporting Information

### Recycling Spent Batteries for Green Innovation: CuCo-based Composite as Electrocatalyst for CO<sub>2</sub> Reduction

Jean C. da Cruz<sup>1,2</sup>, Ricardo M. e Silva<sup>2</sup>, Gelson T. S. T. da Silva<sup>3</sup>, Lucia H. Mascaro<sup>3</sup>, Caue  
Ribeiro<sup>2\*</sup>

<sup>1</sup>*Federal University of São Carlos, Chemistry Department, São Carlos-SP, Brazil*

<sup>2</sup>*Embrapa Instrumentation, Nanotechnology National Laboratory for Agriculture (LNNA), São  
Carlos-SP, Brazil*

<sup>3</sup>*Interdisciplinary Laboratory of Electrochemistry and Ceramics, Department of Chemistry, Federal  
University of Sao Carlos, São Carlos-SP, Brazil.*

**\*Corresponding author:** Caue Ribeiro, caue.ribeiro@embrapa.br

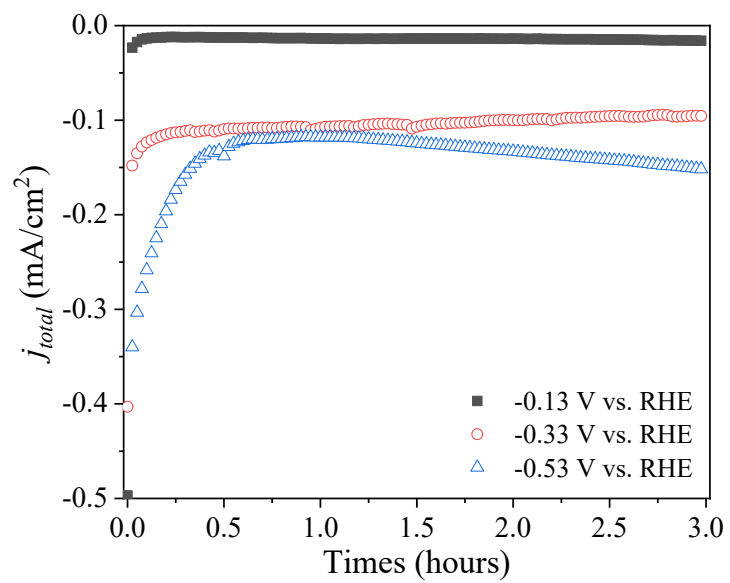

Figure S1 – Chronoamperometries Curves using the prepared electrode applying different potentials. 3 hours.
